# Supplementary material for: Effect of Cationic Lipid Type in Folate-PEG-Modified Cationic Liposomes on Folate Receptor-Mediated siRNA Transfection in Tumor Cells
Source: PubMed Central journal article supplement (PMC6523911; doi:10.3390/pharmaceutics11040181), 2019-04-15
Supplement: pharmaceutics-11-00181-s001.pdf [file pharmaceutics-11-00181-s001.pdf]

# Supplementary Materials: Effect of Cationic Lipid Type in Folate-PEG-Modified Cationic Liposomes on Folate Receptor-Mediated siRNA Transfection in Tumor Cells

Yoshiyuki Hattori, Satono Shimizu, Kei-ichi Ozaki and Hiraku Onishi

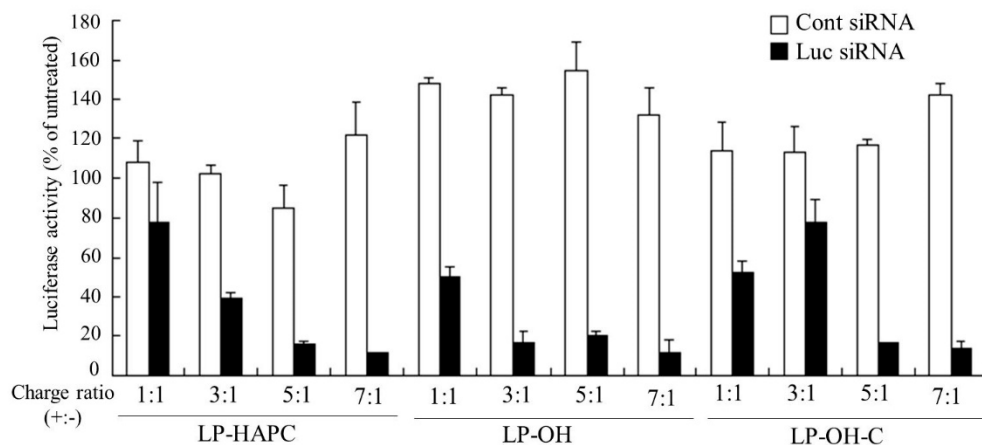

**Figure S1.** Effect of charge ratio (+:-) of siRNA lipoplexes on gene suppression in KB-Luc cells after transfection with siRNA lipoplexes. siRNA lipoplexes were formed at charge ratios (+:-) of 1:1, 3:1, 5:1, and 7:1. siRNA lipoplexes with Cont siRNA or Luc siRNA were added to KB-Luc cells at 50 nM siRNA, and luciferase assays were carried out after 48 h incubation. Each column represents the mean+S.D. ( $n = 3$ ).
